# Supplementary material for: Preparation of nanorod-assembled CNT-embedded LiMnPO4 hollow microspheres for enhanced electrochemical performance of lithium-ion batteries
Source: Royal Society of Chemistry journal article supplement (doi:10.1039/d1ce01342d), 2022-01-01
Supplement: d1ce01342d1.pdf [file d1ce01342d1.pdf]

## Supplementary information

# Preparation of the nanorods-assembled and CNTs-embedded $\text{LiMnPO}_4$ hollow microspheres for enhanced electrochemical performance of lithium ion batteries

Zhi Gao<sup>a</sup>, Tao Zhang<sup>a</sup>, Xiaoliang Pan<sup>\*a</sup>, Shikun Xie<sup>a</sup>, Lijun Liu<sup>b</sup>, Yonghui Zeng<sup>a</sup> and Chengning Xie<sup>a</sup>

*a. School of Mechanical Engineering, Jinggangshan University, Jian, 343009, China.*

*b. School of Chemistry and Chemical Engineering, Jinggangshan University, Jian, 343009, China.*

\*Corresponding author:

E-mail address: xiaoliang\_pan@163.com (X. L. Pan)

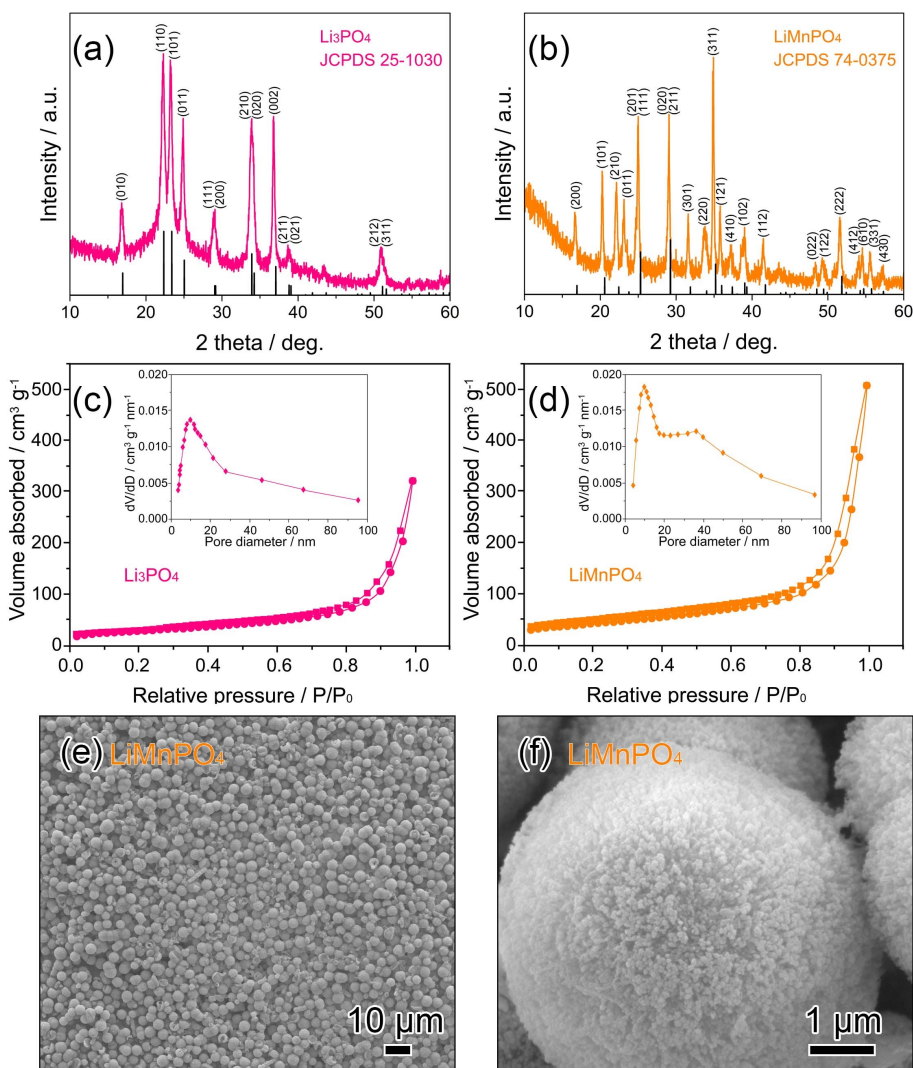

**Fig. S1** XRD patterns,  $\text{N}_2$  adsorption-desorption isotherms (the insets are the corresponding pore-size distributions) and SEM images of the  $\text{Li}_3\text{PO}_4$  (a, c) and the  $\text{LiMnPO}_4$  (b, d, e and f) hollow microspheres.
